# Supplementary material
Source: HighWire-hosted journal article supplement (http://qhc.bmj.com/highwire/filestream/147482/field_highwire_adjunct_files/0/bmjqs-2014-003555supp_appendix1.pdf)
Supplement: bmjqs-2014-003555supp_appendix1.pdf [file bmjqs-2014-003555supp_appendix1.pdf]

## Appendix 1. Test Case Scenario List and Instructions

### Test Case 1:

#### Order instructions:

1. Enter patient allergy for Lisinopril in test patient's chart.
2. Enter order for Captopril 12.5 mg PO TID.

Special instructions: If Lisinopril is not on formulary, use Enalapril 5 mg PO daily.

### Test Case 2:

#### Order instructions:

1. Enter order for Imdur (isosorbide Mononitrate) 30 mg PO daily.
2. Enter order for Revatio (sildenafil) 20 mg PO TID.

Special instructions: Enter both orders in sequence without discontinuing 1st order.

### Test Case 3:

#### Order instructions:

1. Enter "congestive heart failure" or equivalent to patient problem list.
2. Enter order for Pioglitazone 45 mg PO daily.

Special instructions: None.

### Test Case 4:

#### Order instructions:

1. Enter order for Lovenox 40 mg SQ daily.
2. Enter order for Lovenox 100 mg SQ BID.

Special instructions: Enter both orders in sequence without discontinuing 1st order. Note: intention is for first order to be prophylactic dose, second order to be later initiation of therapy without d/c'ing prophylactic dose. If Lovenox is not on formulary, use:

(a) 1. Dalteparin 5000 units SC daily AND 2. Dalteparin 15,000 units SC daily (for 75 kg person at 200 units/kg) OR

(b) 1. Arixtra (fondaparinux) 2.5 mg SC q24 hrs AND 2. Arixtra (fondaparinux) 7.5 mg q24 hrs (for 50-100 kg person)

**Test Case 5:**

Order instructions:

1. Enter order for Insulin Aspart, 60 ml SQ BID.

Special instructions: None.

**Test Case 6:**

Order instructions:

1. Enter order for Metformin 1000 mg PO BID

2. Enter order for Glucovance (glyburide/metformin) 5 mg/500 mg PO BID

Special instructions: Enter both orders in sequence without discontinuing first order.

**Test Case 7:**

Order instructions:

1. Enter order for Metronidazole 250 mg with SIG: "Take two tablets by mouth twice a day." Duration: 7 days, Dispense amount: #14.

Special instructions: Enter order using 250 mg tablets only (total dose: 500 mg BID).

**Test Case 8:**Order instructions:

1. Enter order for Sertraline PO daily (without entering a dose).
2. D/c first order
- [3. Enter order for Sertraline 25 mg PO (without SIG).]

Special instructions: Note: This is a 2-part test.

**Test Case 9:**Order instructions:

1. Enter order for Synthroid (levothyroxine) 100 mg PO daily.

Special instructions: None.

**Test Case 10:**Order instructions:

- 1.Type "penicil" into drug search function.
2. Select Penicillamine from menu (even though what was desired was penicillin).

Special instructions: None.

**Test Case 11:**Order instructions:

1. Enter order for Tylenol Junior Strength Chewable Tabs, 160 mg #24 with instructions (SIG) to administer "1 dropperful every 4 hours."

Special instructions: None.

**Test Case 12:**Order instructions:

1. Enter order for Cardizem CD (diltiazem) 120 mg PO QID.

Special instructions: Make sure to select CD (extended-release) formulation.

**Test Case 13:**Order instructions:

1. Enter order for Methotrexate 15 mg PO daily.

Special instructions: None.

**Test Case 14:**Order instructions:

1. Enter order for Edurant (rilpivirine) 25 mg PO 9am.

Special instructions: None.

**Test Case 15:**Order instructions:

1. Enter order for Prednisone PO as 6-day taper with decreasing doses of: 60 mg x 1 day, 50 mg x 1 day, 40 mg x 1 day, 30 mg x 1 day, 20 mg x 1 day, 10 mg x 2 days.

Special instructions: None.

**Test Case 16:**Order instructions:

1. Enter order for Coumadin 6 mg PO daily Saturday and Thursday, 4 mg PO daily all other days (Mon, Tues, Wed, Fri, Sun).

Special instructions: None.

**Test Case 17:**

Order instructions:

1. Enter order for Streptomycin 0.5 mg IM daily.

Special instructions: None.

**Test Case 18:**

Order instructions:

1. Enter order for Levofloxacin 750 mg IV q24 hours.

2. Enter order for Levofloxacin 500 mg PO q24 hours.

Special instructions: Enter both orders in sequence without discontinuing 1st order. If Levofloxacin not on formulary, enter orders for 1) Cipro 400 mg IV q12 AND 2) Cipro 500 mg PO q12.

**Test Case 19:**

Order instructions:

1. Enter order for Vancomycin 1.25g IV q12 hours.

2. Change dose on first order to 900g IV q12 hours.

Special instructions: *Modify the order without d/c-ing it, if possible.*

**Test Case 20:**

Order instructions:

1. Enter order for Cefepime 2 gm IV q8 hours PRN.

Special instructions: If Cefepime not on formulary, enter order for Cephazolin 2 gm IV q8 hours.

**Test Case 21:**

Order instructions:

1. Enter order for Dexamethasone 100mg IV push.

Special instructions: Note: original prescriber intended to order Hydrocortisone.
